# Supplementary material for: Highly sensitive flexible NO2 sensor composed of vertically aligned 2D SnS2 operating at room temperature
Source: Royal Society of Chemistry journal article supplement (doi:10.1039/d0tc02242j), 2020-01-01
Supplement: d0tc02242j1.pdf [file d0tc02242j1.pdf]

## Supporting Information for

Highly sensitive flexible NO<sub>2</sub> sensor composed of vertically aligned 2D SnS<sub>2</sub> operating at room temperature

Jung Joon Pyeon,<sup>†,a,b</sup> In-Hwan Baek,<sup>†,a,c</sup> Young Geun Song,<sup>a</sup> Gwang Su Kim,<sup>a,b</sup> Ah-Jin Cho,<sup>a</sup> Ga-Yeon Lee,<sup>d</sup> Jeong Hwan Han,<sup>e</sup> Taek-Mo Chung,<sup>d</sup> Cheol Seong Hwang,<sup>c</sup> Chong-Yun Kang,<sup>a,b,\*</sup>, and Seong Keun Kim<sup>a,\*</sup>

<sup>a</sup>*Center for Electronic Materials, Korea Institute of Science and Technology, Seoul 02792, Korea.*

<sup>b</sup>*KU-KIST Graduate School of Converging Science and Technology, Korea University, Seoul 02841, Korea*

<sup>c</sup>*Department of Materials Science and Engineering and Inter-University Semiconductor Research Center, Seoul National University, Seoul 08826, Korea*

<sup>d</sup>*Division of Advanced Materials, Korea Research Institute of Chemical Technology, Daejeon 34114, Korea*

<sup>e</sup>*Department of Materials Science and Engineering, Seoul National University of Science and Technology, Seoul 01811, Korea*

<sup>†</sup> *These two authors equally contributed to this work.*

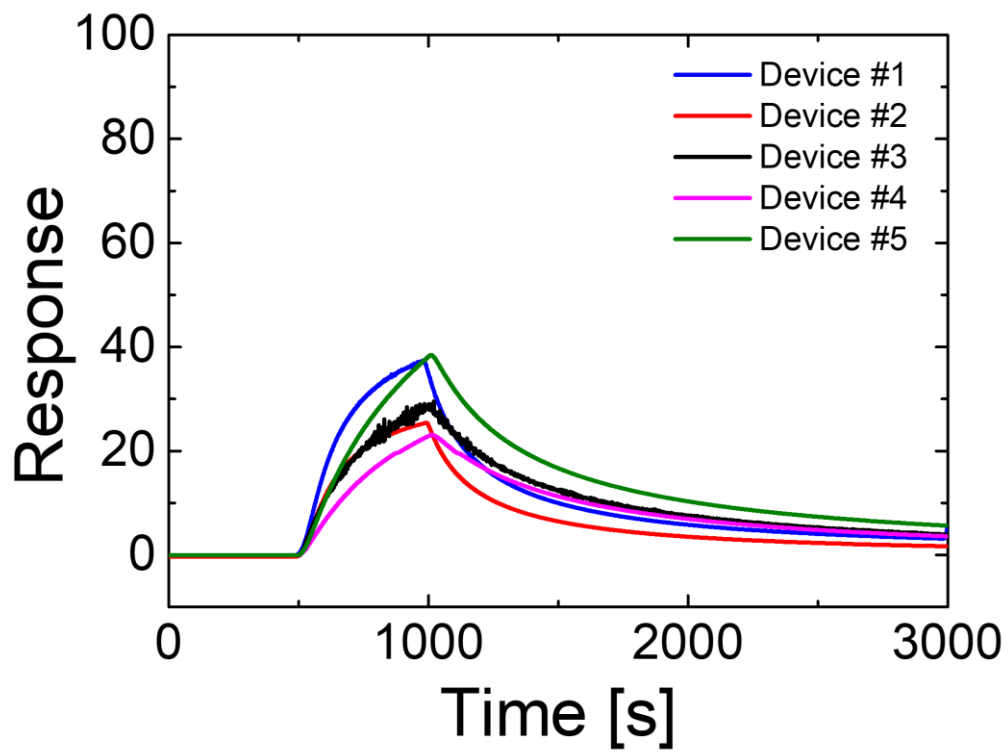

**Figure S1.** Variation in the response of five different SnS<sub>2</sub> gas sensors towards 100 ppb NO<sub>2</sub> at room temperature.

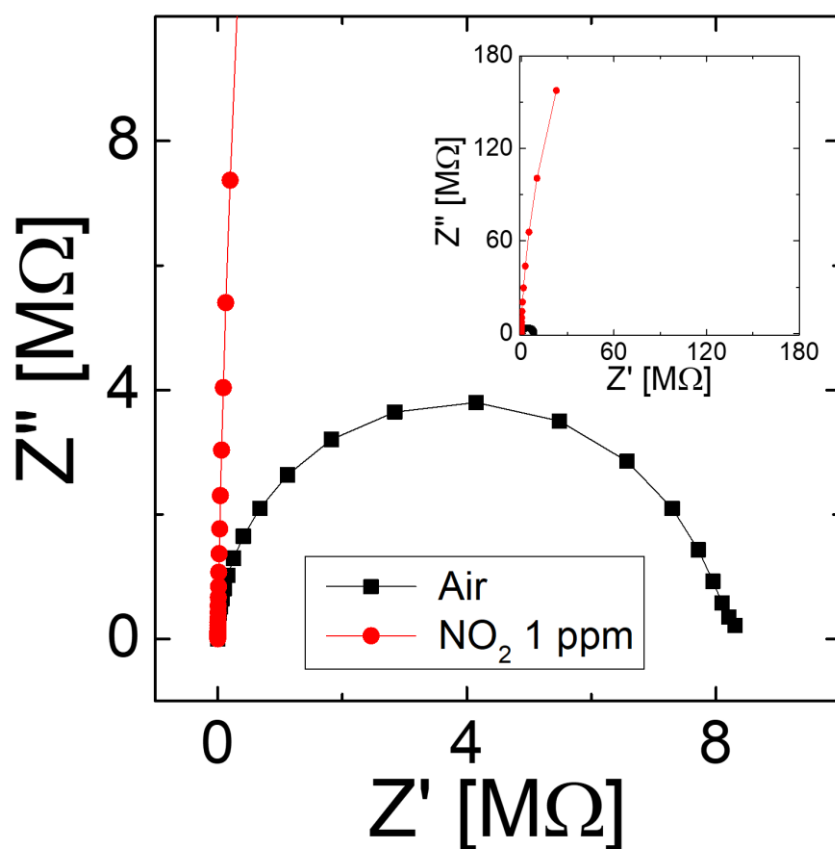

**Figure S2.** Nyquist plots of the SnS<sub>2</sub> sensors with and without exposure of 1 ppm NO<sub>2</sub>. The AC impedance analysis was performed at a frequency range from 0.1 Hz to 1 MHz at room temperature.

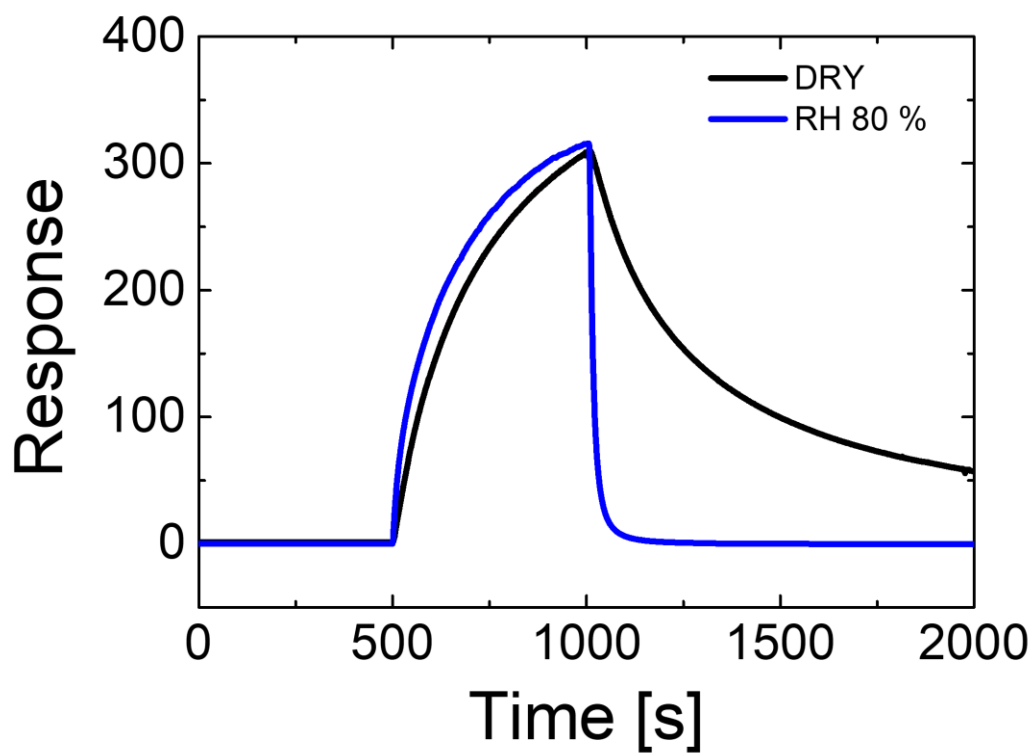

**Figure S3.** Variation in the response of the SnS<sub>2</sub> sensor towards 1 ppm NO<sub>2</sub> gas in atmosphere with relative humidity of 0 and 80 %, respectively.
